# Supplementary material for: Features of the Metabolic Profile of Saliva in Lung Cancer and COPD: The Effect of Smoking Status
Source: MDPI journal article supplement (doi:10.3390/metabo11050289), 2021-04-30
Supplement: s1 [file s1]

**Table S1.** Biochemical indicators of saliva depending on smoking

| Indicators                | Non-smokers, n=219     | Smokers, n=169         | Kruskal-Wallis test<br>(H, p) |
|---------------------------|------------------------|------------------------|-------------------------------|
| pH                        | 6.48 [6.20; 6.82]      | 6.50 [6.28; 6.73]      | 0.0813, 0.7756                |
| Calcium, mmol/L           | 1.41 [1.03; 1.80]      | 1.38 [0.98; 1.88]      | 0.1624, 0.6870                |
| Phosphorus, mmol/L        | 4.56 [3.40; 5.60]      | 4.40 [3.27; 5.91]      | 0.4138, 0.5200                |
| Ca/P-ratio, c.u.          | 0.33 [0.23; 0.47]      | 0.30 [0.20; 0.48]      | 1.646, 0.1996                 |
| Sodium, mmol/L            | 9.0 [5.5; 12.8]        | 9.6 [6.0; 15.0]        | 1.213, 0.2708                 |
| Potassium, mmol/L         | 12.5 [9.3; 16.3]       | 13.2 [9.0; 15.9]       | 0.7379, 0.3903                |
| Na/K-ratio, c.u.          | 0.75 [0.47; 1.12]      | 0.74 [0.48; 1.39]      | 0.3487, 0.5549                |
| Chlorides, mmol/L         | 26.5 [21.3; 33.7]      | 29.5 [22.8; 37.6]      | 5.775, 0.0163*                |
| Magnesium, mmol/L         | 0.301 [0.239; 0.377]   | 0.299 [0.225; 0.369]   | 0.2250, 0.6353                |
| Protein, g/L              | 0.67 [0.39; 1.04]      | 0.59 [0.33; 0.99]      | 0.9710, 0.3244                |
| Uric acid, $\mu$ mol/L    | 90.4 [43.6; 166.7]     | 79.2 [34.7; 163.5]     | 0.01516, 0.9020               |
| Sialic acids, mmol/L      | 0.165 [0.088; 0.287]   | 0.183 [0.098; 0.281]   | 0.2644, 0.6071                |
| Pyruvic acid, $\mu$ mol/L | 14.71 [10.54; 22.06]   | 13.85 [9.31; 21.45]    | 0.01097, 0.9166               |
| ALT, U/L                  | 4.08 [2.69; 6.31]      | 3.77 [2.69; 5.38]      | 0.3394, 0.5602                |
| AST, U/L                  | 5.50 [3.58; 8.08]      | 5.00 [3.00; 7.17]      | 2.491, 0.1145                 |
| AST/ALT, c.u.             | 1.32 [1.03; 1.73]      | 1.22 [0.92; 1.60]      | 3.603, 0.0577**               |
| LDH, U/L                  | 1158.0 [574.9; 1888.0] | 1092.0 [559.5; 1616.0] | 0.7354, 0.3911                |
| GGT, U/L                  | 21.6 [17.9; 25.7]      | 21.7 [18.2; 25.5]      | 0.01148, 0.9147               |
| Catalase, ncat/mL         | 2.80 [2.13; 4.33]      | 2.51 [1.94; 3.50]      | 4.482, 0.0343*                |
| SOD, c.u.                 | 65.8 [31.6; 130.3]     | 60.5 [26.3; 100.0]     | 1.474, 0.2247                 |
| $\alpha$ -amylase, U/L    | 320.1 [173.4; 645.0]   | 268.2 [124.1; 635.2]   | 0.4223, 0.5158                |
| AOA, mmol/L               | 1.69 [1.49; 1.85]      | 1.85 [1.45; 2.14]      | 3.563, 0.0591**               |
| Diene conjugates, c.u.    | 3.98 [3.78; 4.16]      | 3.98 [3.81; 4.18]      | 0.04426, 0.5059               |
| Triene conjugates, c.u.   | 0.882 [0.779; 0.997]   | 0.907 [0.792; 0.999]   | 0.5500, 0.4583                |
| Schiff bases, c.u.        | 0.556 [0.488; 0.665]   | 0.551 [0.491; 0.662]   | 0.00415, 0.9837               |
| MDA, mmol/L               | 7.35 [5.73; 9.32]      | 7.01 [5.81; 9.57]      | 0.06474, 0.7992               |

Note. \* - differences between groups are statistically significant,  $p < 0.05$ ; \*\* - differences between groups are statistically significant,  $p < 0.10$ . AST/ALT – aspartate aminotransferase to alanine aminotransferase ratio, LDH – lactate dehydrogenase, GGT – gamma glutamyltransferase, SOD – superoxide dismutase, AOA – antioxidant activity, MDA – malondialdehyde.

**Table S2.** Correlation coefficients of salivary biochemical indicators with principal components (Smokers and Non-smokers, Fig. 1b)

| Correlation                  | PC1  | PC2   | PC3   | PC4   |
|------------------------------|------|-------|-------|-------|
| Chlorides, mmol/L            | 0.60 | 0.42  | -0.45 | -0.51 |
| AST/ALT-ratio, c.u.          | 0.42 | 0.65  | 0.48  | 0.42  |
| Catalase, ncat/mL            | 0.59 | -0.46 | -0.39 | 0.53  |
| Antioxidant activity, mmol/L | 0.50 | -0.50 | 0.60  | -0.37 |

**Table S3.** Correlation coefficients of salivary biochemical indicators with principal components (Smokers I, Smokers II and Smokers III, Fig. 1d)

| Correlation                | PC1         | PC2         | PC3         | PC4   | PC5   |
|----------------------------|-------------|-------------|-------------|-------|-------|
| Phosphorus, mmol/L         | <b>0.80</b> | 0.14        | 0.14        | -0.05 | 0.42  |
| Potassium, mmol/L          | <b>0.83</b> | -0.14       | -0.14       | 0.05  | 0.21  |
| AST/ALT-ratio, c.u.        | -0.01       | <b>0.73</b> | -0.34       | 0.59  | 0.01  |
| Superoxide dismutase, c.u. | 0.24        | -0.02       | <b>0.83</b> | 0.46  | -0.21 |
| Ca/P-ratio, c.u.           | -0.47       | -0.55       | -0.10       | 0.54  | 0.42  |
| Na/K-ratio, c.u.           | -0.58       | 0.41        | 0.42        | -0.27 | 0.46  |

Note. Here and in Tables S4-10, strong correlations are highlighted in red.

**Table S4.** Correlation coefficients of salivary biochemical indicators with principal components (Smokers I, Smokers II, Smokers III, and Non-smokers, Fig. 1f)

| Correlation                | PC1         | PC2   | PC3   | PC4   | PC5   |
|----------------------------|-------------|-------|-------|-------|-------|
| Phosphorus, mmol/L         | <b>0.79</b> | -0.01 | -0.14 | -0.07 | 0.20  |
| Chlorides, mmol/L          | <b>0.74</b> | 0.05  | 0.13  | 0.03  | 0.43  |
| AST/ALT-ratio, c.u.        | 0.24        | -0.48 | 0.61  | 0.50  | -0.30 |
| Catalase, ncat/mL          | 0.19        | 0.63  | -0.26 | 0.65  | -0.28 |
| Superoxide dismutase, c.u. | 0.29        | 0.48  | 0.47  | -0.51 | -0.46 |
| Ca/P-ratio, c.u.           | -0.40       | 0.43  | 0.54  | 0.17  | 0.55  |

**Table S5.** Correlation coefficients of salivary biochemical indicators with principal components (NO COPD, COPD I and COPD II, Fig.2b)

| Correlation         | PC1         | PC2   | PC3   | PC4   | PC5   |
|---------------------|-------------|-------|-------|-------|-------|
| pH                  | -0.47       | 0.52  | 0.07  | -0.25 | -0.05 |
| Calcium, mmol/L     | 0.44        | -0.38 | 0.50  | -0.27 | -0.07 |
| Magnesium, mmol/L   | 0.53        | -0.19 | 0.37  | -0.26 | 0.25  |
| AST/ALT-ratio, c.u. | 0.01        | -0.07 | -0.33 | -0.13 | 0.90  |
| LDH, U/L            | <b>0.71</b> | 0.41  | -0.20 | 0.16  | -0.00 |

|                        |       |       |       |             |       |
|------------------------|-------|-------|-------|-------------|-------|
| Catalase, ncat/mL      | 0.61  | 0.57  | -0.23 | 0.09        | -0.08 |
| Sialic acids, mmol/L   | 0.29  | -0.57 | -0.35 | 0.24        | -0.21 |
| Diene conjugates, c.u. | -0.14 | -0.12 | 0.20  | <b>0.84</b> | 0.20  |
| Schiff bases, c.u.     | 0.06  | 0.35  | 0.68  | 0.26        | 0.17  |

**Table S6.** Correlation coefficients of salivary biochemical indicators with principal components (NO COPD, COPD I and COPD II + Smokers/Non-smokers, Fig.3b)

| Correlation            | PC1   | PC2         | PC3         | PC4   | PC5   |
|------------------------|-------|-------------|-------------|-------|-------|
| pH                     | -0.52 | 0.20        | 0.01        | 0.42  | 0.30  |
| Calcium, mmol/L        | 0.37  | -0.25       | -0.56       | 0.20  | -0.56 |
| Chlorides, mmol/L      | 0.69  | -0.12       | 0.04        | 0.08  | -0.07 |
| Uric acid, $\mu$ mol/L | 0.39  | -0.17       | -0.29       | 0.63  | 0.42  |
| AST/ALT-ratio, c.u.    | 0.14  | -0.02       | <b>0.74</b> | 0.49  | -0.34 |
| LDH, U/L               | 0.52  | 0.68        | -0.08       | 0.01  | 0.01  |
| Catalase, ncat/mL      | 0.31  | <b>0.82</b> | -0.09       | -0.01 | 0.02  |
| Sialic acids, mmol/L   | 0.56  | -0.36       | 0.08        | -0.22 | 0.43  |
| GGT                    | 0.66  | -0.07       | 0.33        | -0.17 | 0.08  |

**Table S7.** Correlation coefficients of salivary biochemical indicators with principal components (COPD + Smokers I, Smokers II, Smokers III, and Non-smokers, Fig. 4b)

| Correlation               | PC1         | PC2         | PC3          | PC4         | PC5   |
|---------------------------|-------------|-------------|--------------|-------------|-------|
| pH                        | 0.11        | -0.18       | <b>-0.76</b> | -0.27       | -0.26 |
| Phosphorus, mmol/L        | <b>0.75</b> | 0.00        | -0.13        | -0.01       | 0.12  |
| Uric acid, $\mu$ mol/L    | 0.52        | 0.43        | 0.29         | -0.14       | 0.04  |
| AST/ALT-ratio, c.u.       | -0.04       | 0.06        | -0.18        | <b>0.94</b> | 0.07  |
| Catalase, ncat/mL         | 0.19        | -0.62       | 0.31         | -0.06       | 0.56  |
| Pyruvic acid, $\mu$ mol/L | 0.48        | -0.01       | 0.44         | 0.14        | -0.59 |
| Diene conjugates, c.u.    | -0.11       | <b>0.79</b> | -0.06        | -0.10       | 0.33  |
| Ca/P-ratio, c.u.          | -0.66       | -0.01       | 0.38         | -0.11       | -0.20 |

**Table S8.** Correlation coefficients of salivary biochemical indicators with principal components (COPD Yes/No + Smokers I, Smokers II, and Smokers III, Fig. 4d)

| Correlation               | PC1   | PC2   | PC3   | PC4   | PC5         |
|---------------------------|-------|-------|-------|-------|-------------|
| pH                        | -0.43 | 0.53  | -0.55 | -0.00 | 0.15        |
| Phosphorus, mmol/L        | 0.69  | -0.08 | -0.28 | -0.36 | -0.12       |
| Catalase, ncat/mL         | 0.18  | 0.61  | 0.31  | 0.52  | -0.43       |
| Pyruvic acid, $\mu$ mol/L | 0.51  | 0.37  | 0.06  | 0.17  | <b>0.73</b> |

|                        |             |       |       |       |       |
|------------------------|-------------|-------|-------|-------|-------|
| Diene conjugates, c.u. | -0.09       | -0.57 | -0.36 | 0.69  | 0.11  |
| GGT, U/L               | <b>0.72</b> | -0.20 | 0.23  | 0.12  | -0.02 |
| Ca/P-ratio, c.u.       | -0.48       | -0.16 | 0.69  | -0.08 | 0.26  |

**Table S9.** Correlation coefficients of salivary biochemical indicators with principal components (COPD Yes/No + Smokers I, Smokers III, and Non-smokers, Fig. 4f)

| Correlation               | PC1         | PC2   | PC3   | PC4         | PC5   |
|---------------------------|-------------|-------|-------|-------------|-------|
| pH                        | -0.30       | 0.01  | 0.52  | 0.33        | -0.37 |
| Phosphorus, mmol/L        | 0.41        | -0.71 | 0.07  | 0.11        | -0.22 |
| Uric acid, $\mu$ mol/L    | <b>0.73</b> | -0.04 | -0.23 | 0.07        | -0.15 |
| AST/ALT-ratio, c.u.       | -0.05       | -0.17 | -0.27 | <b>0.71</b> | 0.60  |
| Catalase, ncat/mL         | 0.20        | -0.23 | 0.32  | -0.53       | 0.59  |
| Pyruvic acid, $\mu$ mol/L | 0.68        | 0.23  | 0.31  | 0.19        | -0.03 |
| Diene conjugates, c.u.    | 0.13        | 0.43  | -0.63 | -0.14       | -0.12 |
| Ca/P-ratio, c.u.          | 0.22        | 0.68  | 0.40  | 0.14        | 0.20  |

**Table S10.** Correlation coefficients of salivary biochemical indicators with principal components (COPD I, COPD II + Smokers I, Smokers III, and Non-smokers, Fig. 5b)

| Correlation            | PC1   | PC2         | PC3   | PC4   | PC5   |
|------------------------|-------|-------------|-------|-------|-------|
| pH                     | -0.65 | -0.52       | 0.06  | -0.19 | 0.16  |
| Calcium, mmol/L        | 0.61  | -0.25       | -0.31 | -0.16 | 0.44  |
| Chlorides, mmol/L      | 0.63  | 0.07        | 0.48  | -0.09 | 0.23  |
| AST/ALT-ratio, c.u.    | -0.20 | 0.31        | 0.39  | 0.70  | 0.39  |
| Catalase, ncat/mL      | 0.33  | -0.39       | 0.34  | 0.27  | -0.67 |
| Diene conjugates, c.u. | -0.07 | <b>0.77</b> | 0.08  | -0.41 | -0.23 |
| Ca/P-ratio, c.u.       | 0.13  | 0.17        | -0.76 | 0.43  | -0.15 |
